# Supplementary material for: Saliva and Plasma Neutralizing Activity Induced by the Administration of a Third bnt162b2 Vaccine Dose
Source: MDPI journal article supplement (doi:10.3390/ijms232214341), 2022-11-18
Supplement: s1 [file s1]

**Supplementary Table S1. Cohort study features.**

|    | Subject N° | Gender | Age<br>(years) | Time from<br>Infection<br>(months) | Time from<br>2nd dose<br>(months) |
|----|------------|--------|----------------|------------------------------------|-----------------------------------|
| SV | 1          | F      | 25             | -                                  | 8                                 |
|    | 2          | F      | 28             | -                                  | 9                                 |
|    | 3          | F      | 49             | -                                  | 8                                 |
|    | 4          | M      | 58             | -                                  | 8                                 |
|    | 5          | M      | 26             | -                                  | 8                                 |
|    | 6          | F      | 25             | -                                  | 8                                 |
|    | 7          | F      | 25             | -                                  | 8                                 |
|    | 8          | M      | 25             | -                                  | 8                                 |
|    | 9          | M      | 26             | -                                  | 8                                 |
|    | 10         | M      | 26             | -                                  | 8                                 |
|    | 11         | F      | 26             | -                                  | 8                                 |
|    | 12         | F      | 26             | -                                  | 7                                 |
|    | 13         | F      | 26             | -                                  | 8                                 |
|    | 14         | F      | 20             | -                                  | 7                                 |
|    | 15         | F      | 26             | -                                  | 9                                 |
|    | 16         | F      | 20             | -                                  | 5                                 |
|    | 17         | M      | 22             | -                                  | 8                                 |
|    | 18         | F      | 23             | -                                  | 8                                 |
|    | 19         | F      | 25             | -                                  | 8                                 |
|    | 20         | M      | 28             | -                                  | 8                                 |
|    | 21         | M      | 23             | -                                  | 8                                 |
|    | 22         | F      | 24             | -                                  | 8                                 |
|    | 23         | F      | 25             | -                                  | 8                                 |
|    | 24         | F      | 51             | -                                  | 6                                 |
|    | 25         | F      | 40             | -                                  | 6                                 |
|    | 26         | F      | 68             | -                                  | 6                                 |
|    | 27         | M      | 23             | -                                  | 8                                 |
|    | 28         | F      | 34             | -                                  | 8                                 |
|    | 29         | F      | 35             | -                                  | 6                                 |
|    | 30         | M      | 40             | -                                  | 6                                 |
|    | 31         | M      | 30             | -                                  | 6                                 |
|    | 32         | F      | 33             | -                                  | 6                                 |
|    | 33         | F      | 36             | -                                  | 6                                 |
|    | 34         | F      | 20             | -                                  | 5                                 |
|    | 35         | F      | 23             | -                                  | 8                                 |
|    | 36         | F      | 24             | -                                  | 8                                 |
|    | 37         | M      | 20             | -                                  | 10                                |
|    | 38         | F      | 23             | -                                  | 9                                 |
|    | 39         | F      | 47             | -                                  | 5                                 |
|    | 40         | M      | 22             | -                                  | 6                                 |
|    | 41         | F      | 57             | -                                  | 6                                 |
|    | 42         | M      | 40             | -                                  | 6                                 |
|    | 43         | F      | 23             | -                                  | 9                                 |

|      |    |   |    |      |    |
|------|----|---|----|------|----|
|      | 44 | F | 26 | -    | 8  |
|      | 45 | F | 43 | -    | 5  |
|      | 46 | F | 37 | -    | 6  |
|      | 47 | F | 19 | -    | 6  |
|      | 48 | F | 81 | -    | 7  |
|      | 49 | F | 78 | -    | 5  |
|      | 50 | M | 47 | -    | 5  |
|      | 51 | F | 20 | -    | 7  |
|      | 52 | F | 35 | -    | 5  |
|      | 53 | F | 63 | -    | 6  |
|      | 54 | M | 31 | -    | 6  |
|      | 55 | F | 23 | -    | 6  |
| SIV  | 1  | M | 47 | 12   | 6  |
|      | 2  | F | 60 | 13   | 6  |
|      | 3  | M | 72 | 13   | 6  |
|      | 4  | F | 55 | 12   | 6  |
|      | 5  | F | 24 | 12   | 6  |
|      | 6  | M | 25 | 12   | 5  |
|      | 7  | F | 62 | 12   | 8  |
|      | 8  | M | 71 | 12   | 7  |
|      | 9  | M | 74 | 11   | 6  |
|      | 10 | M | 40 | 11   | 5  |
|      | 11 | F | 36 | 21   | 8  |
|      | 12 | F | 18 | 24   | 6  |
|      | 13 | F | 18 | 24   | 6  |
|      | 14 | F | 50 | 24   | 10 |
|      | 15 | F | 55 | 24   | 6  |
|      | 16 | F | 71 | 11   | 4  |
|      | 17 | M | 54 | 24   | 5  |
|      | 18 | M | 18 | 24   | 5  |
|      | 19 | F | 56 | 10   | 6  |
|      | 20 | F | 81 | 10   | 5  |
|      | 21 | F | 54 | 13   | 5  |
|      | 22 | M | 85 | 10   | 5  |
|      | 23 | F | 20 | 13   | 3  |
|      | 24 | M | 20 | 11   | 5  |
|      | 25 | F | 53 | 11   | 7  |
|      | 26 | F | 25 | 17   | 5  |
|      | 27 | M | 49 | 9    | 6  |
| SIV2 | 1  | F | 25 | 0.6  | 9  |
|      | 2  | F | 22 | 0.17 | 9  |
|      | 3  | F | 34 | 0.43 | 8  |
|      | 4  | F | 58 | 0.23 | 6  |
|      | 5  | M | 21 | 0.33 | 5  |
|      | 6  | M | 36 | 0.5  | 6  |
|      | 7  | F | 34 | 1    | 7  |
|      | 8  | M | 74 | 0.23 | 7  |
|      | 9  | M | 78 | 0.5  | 6  |
|      | 10 | M | 54 | 1    | 4  |
|      | 11 | F | 43 | 0.7  | 5  |
|      | 12 | M | 18 | 0.5  | 6  |

|      |    |   |    |      |    |
|------|----|---|----|------|----|
|      | 13 | M | 36 | 0.7  | 4  |
|      | 14 | F | 22 | 0.6  | 6  |
|      | 15 | M | 29 | 0.53 | 6  |
|      | 16 | M | 23 | 0.33 | 6  |
| SIV3 | 1  | F | 51 | 0.5  | 6  |
|      | 2  | M | 36 | 0.23 | 5  |
|      | 3  | F | 31 | 0.5  | 8  |
|      | 4  | F | 78 | 0.5  | 7  |
|      | 5  | F | 50 | 0.43 | 6  |
|      | 6  | F | 73 | 0.33 | 10 |
|      | 7  | M | 76 | 0.6  | 7  |
|      | 8  | M | 50 | 0.5  | 11 |
|      | 9  | M | 66 | 0.7  | 10 |
|      | 10 | M | 28 | 0.33 | 10 |
|      | 11 | F | 32 | 0.27 | 9  |
|      | 12 | M | 40 | 0.4  | 12 |
|      | 13 | M | 18 | 0.57 | 5  |
|      | 14 | F | 26 | 1    | 11 |
|      | 15 | F | 26 | 1    | 14 |
|      | 16 | M | 58 | 0.5  | 13 |
|      | 17 | M | 27 | 0.7  | 9  |
|      | 18 | F | 43 | 0.23 | 11 |
|      | 19 | F | 78 | 0.3  | 11 |
|      | 20 | M | 86 | 0.37 | 11 |
|      | 21 | M | 30 | 0.27 | 12 |
|      | 22 | F | 36 | 0.4  | 12 |
|      | 23 | F | 23 | 0.5  | 8  |
|      | 24 | F | 35 | 1    | 7  |

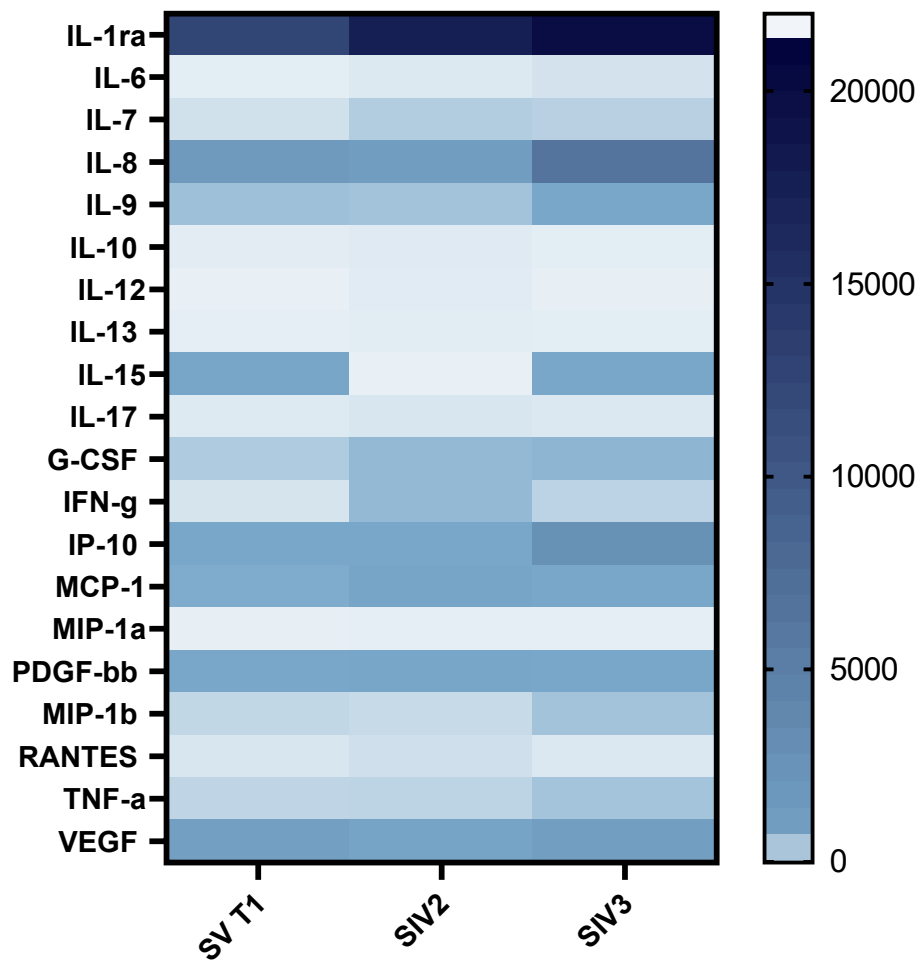

**Supplementary Figure S1. Cytokine secretion in saliva samples from SARS-CoV-2 Vaccinated Subjects (SV) at T1, SARS-CoV-2 infected Subjects after 2 doses (SIV2), or 3 doses of vaccine (SIV3).** Cytokine release in saliva samples from SIV2 and SIV3 was higher compared to vaccinated subjects at T1 suggesting the maintenance of a slight state of immune activation despite recent recovery
